# Supplementary material
Source: publisher figshare collection journal article supplement (https://gsapubs.figshare.com/ndownloader/files/24125573)
Supplement: Supplementary file 1 [file 24125573]

## Sheet: Table S2
TABLE S2. WHOLE-ROCK MAJOR-OXIDE AND TRACE-ELEMENT ANALYSES OF THE BASALTS OF TENNANT, DRY LAKE AND HAMMOND CROSSING
Unit / Sample Number	Reference	Latitude (°N)	Longitude (°W)	SiO2	TiO2	Al2O3	FeO*	Fe2O3	FeO	MnO	MgO	CaO	Na2O	K2O	P2O5	LOI	Total	Mg#		Sc	Cr	Ni	V	Cu	Zn	Ga	Cs	Rb	Ba	Sr	Pb	Th	U	Zr	Hf	Ta	Y	Nb	La	Ce	Nd
Basalt of Tennant
1A607*	This study	41.646	121.963	48.9123	0.931139	17.9441	9.39613	1.56602	7.98671	0.167665	8.46309	10.9282	2.8044	0.209581	0.0868265	-0.418585	100.054	65.3812		36.2	186.8	131.5	207.6	75	66.3			2.7	87.2	326	ND	ND	ND	58.1	1.3	ND	22.4	1.4	5.5	10.3	9.6
1A620*	This study	41.646	121.963	48.7912	0.893388	18.2579	9.06154	1.51026	7.70231	0.163071	8.82383	10.8447	2.73119	0.200087	0.0820356	-0.42714	99.8137	67.1248		34.3	197.2	145.1	193.2	78.4	63.4			2.6	90.1	328.2	1.6	0.6	1.4	56	1	ND	20.5	1.2	2.1	9.6	7.6
1A680*	This study	41.598	121.881	48.834	0.893244	18.1244	9.03983	1.50664	7.68386	0.161682	8.83264	10.9285	2.74461	0.209588	0.0808411	-0.329102	100.054	67.1997		34.4	200.9	137.1	199.5	78.4	63.6			3.4	81.7	324.8	1.1	ND	1.5	55	1.3	0.6	20.8	2	1.5	9.3	9.1
1A692*	This study	41.598	121.881	48.3778	0.905827	18.4081	9.04731	1.50789	7.69022	0.163873	8.99795	11.069	2.6642	0.130697	0.08445	-0.390625	99.3299	67.589		34.1	201.7	142.9	200.8	74.5	66.2			1.2	76.7	321.7	ND	ND	2.2	55.9	0.7	ND	19.5	1.6	6.7	6	7.2
B17DD070** - near vent	This study	41.5708	121.919	49.8677	0.859589	18.7764	8.54601	1.42434	7.26411	0.151155	7.89918	10.4102	3.00337	0.247703	0.0963404	-0.201915	99.0821	65.9645		31.5	167.3	108.8	188.4	67.6	66.8	15.6	1	2.1	118.2	462	3.3	ND	ND	59.4	1	ND	19.1	2.1	6.1	11.2	8.4
B17DD071**	This study	41.6052	121.927	49.4257	0.885195	18.2175	8.90069	1.48345	7.56559	0.156296	8.33369	10.6923	2.88185	0.265289	0.0931566	-0.390334	99.3711	66.2532		33.6	192.7	118.4	198.4	61.4	63.4	17.3	ND	3.6	108.7	385.9	0.9	1.1	0.6	58.1	1.6	ND	19.2	1.5	2.4	9.7	7.3
81SH-449†	This study	41.6111	121.963	49.0155	0.924981	18.0039	9.14918	1.52486	7.77681	0.16478	8.59273	10.9072	2.80502	0.199686	0.0846249	ND	100.778	66.3219		39.6	204.9	136.9	223.5	90	66.9	18.4		3.1	92.8	319.7	1.6	ND	ND	62.2			23.6	1.8	6.5	10.7	8.7
81SH-480†	This study	41.7011	121.853	49.1614	0.938811	17.9686	9.17612	1.52935	7.7997	0.161516	8.70167	10.9023	2.5035	0.161516	0.171611	0.05	99.92	66.5373			202	130	186	54	61	13		ND	115	336	ND			55			16	ND	ND	ND	ND
82SH-498†	This study	41.7131	121.839	49.421	0.890087	18.1904	8.78583	1.46431	7.46796	0.155572	8.55745	10.6621	2.87588	0.227324	0.0878334	ND	101.283	67.1302		33.5	212.8	130.2	206.3	72.1	66.3	17.8		3.6	103.6	380.2	0.8	ND	0.5	62.1			20.8	1.5	4.6	10.1	10.3
93SH-690† - near vent	This study	41.5568	121.868	52.5697	0.825807	19.5374	7.17848	1.19641	6.10171	0.130921	6.32447	9.30544	3.35358	0.523683	0.130921	0.1	99.97	64.8798
93SH-692† - near vent	This study	41.5356	121.874	52.3094	0.840466	19.1372	7.47259	1.24543	6.3517	0.133023	6.61892	9.4376	3.26512	0.505892	0.155194	0.04	99.931	65.0016				76		79	70			11	199	648				78				ND
93SH-698† - near vent	This study	41.5516	121.914	51.1847	0.886664	18.5393	8.12507	1.35418	6.90631	0.14106	7.34521	10.0254	3.09325	0.382878	0.14106	ND	100.01	65.4643				95		83	63			10	161	508				68			17	ND
93SH-722† - near vent	This study	41.5314	121.847	51.6529	0.859196	18.9023	7.92381	1.32064	6.73524	0.141515	7.02519	9.72408	3.10322	0.414436	0.121298	0.11	99.67	65.023
94SH-770†	This study	41.6416	121.868	48.6733	0.905082	18.2022	8.96031	1.49339	7.61627	0.160903	9.09105	10.9615	2.61468	0.17096	0.110621	ND	100.28	68.0246				113		83	64				78	311				64			18
94SH-772†	This study	41.7288	122	48.4705	0.974099	18.1684	9.34893	1.55815	7.94659	0.16976	8.80934	10.9687	2.67271	0.131362	0.130351	0.01	99.837	66.3955				99		80	62				133	321				65				ND
94SH-774†	This study	41.7063	121.848	49.0289	0.906033	18.4109	8.81593	1.46932	7.49354	0.159769	8.7236	10.7743	2.72113	0.182016	0.130445	0.23	99.716	67.4782				109		71	65				142	362				65				ND
94SH-781A†	This study	41.6428	121.864	48.9052	0.947853	17.9487	9.16594	1.52766	7.79105	0.161337	8.91385	10.7894	2.70239	0.201671	0.110919	ND	100.03	67.096				129		89	66			ND	114	318				61			17	ND
94SH-781B†	This study	41.6428	121.864	48.889	0.907219	18.0436	9.02683	1.50447	7.67281	0.161283	8.90083	10.8866	2.73174	0.191524	0.110882	ND	100.05	67.4007				124		89	60				118	307				61			18	ND
94SH-783†	This study	41.6549	122.013	48.782	0.92726	17.9405	8.88961	1.4816	7.55616	0.161263	9.14158	11.0868	2.64068	0.171342	0.110868	ND	100.05	68.3168				141		80	64			ND	103	274				58			20	ND
95SH-793†	This study	41.6231	121.876	49.2732	0.943316	18.1638	8.94143	1.49024	7.60021	0.160564	8.45974	10.7377	2.82995	0.240847	0.100353	ND	100.49	66.4863				104		91	66				110	360				67			24	ND
00SH-1063†	This study	41.6503	122.014	48.6621	0.912913	17.8959	9.02414	1.50402	7.67052	0.168145	9.187	11.1032	2.66278	0.153689	0.0797266	ND	101.299	68.0986		37.7	227.9	139.938	210.7	68.3	64.6	13.3		2.7	77.7	284.8	ND		1.7	58.2			21.2	0.9	3.2	6.8	7.7
1550M† - near vent	Donnelly-Nolan, 2008	41.5827	121.873	51.0368	0.833869	18.7872	8.02021	1.3367	6.81718	0.140653	7.34407	10.1471	3.04412	0.401864	0.110513	ND	100.29	65.7539		28.4	144.5	85		73	51.3		ND	11.3	170	590		0.73	0.54	82	1.64	ND	21	2	5.9	12.5	7.8
1551M†	Donnelly-Nolan, 2008	41.64	121.865	48.7195	0.890356	17.8071	9.0036	1.5006	7.65306	0.160064	9.06363	11.2045	2.71108	0.190076	0.10004	ND	100.81	67.8539			210	143		67	59			5	81	315				72			24	10
1623M† - near vent	Donnelly-Nolan, 2008	41.5938	121.957	49.3261	0.890472	18.2097	8.82468	1.47078	7.50098	0.15008	8.42446	10.9058	2.80148	0.220117	0.100053	ND	100.78	66.6858		33.9	216	110		88	54		ND	4.6	114	460		0.53	ND	68	1.57	ND	16	1	4.07	10.4	6.9
1624M† - near vent	Donnelly-Nolan, 2008	41.5752	121.916	49.5664	0.864647	18.8011	8.5962	1.4327	7.30677	0.150811	8.18399	10.5567	2.83524	0.201081	0.10054	0.1	100.27	66.6251		31.7	190	108		75	57		ND	4	128	530		0.67	ND	75	1.57	ND	17	2	4.62	10.5	7.9
1633M†	Donnelly-Nolan, 2008	41.7067	121.973	48.3208	0.85568	18.7243	8.888	1.48133	7.5548	0.161069	9.25142	10.8722	2.52677	0.161069	0.0906015	ND	100.17	68.5786			188	142		60	62			13	75	351				80			31	6
1634M†	Donnelly-Nolan, 2008	41.6617	121.93	48.2352	0.886158	18.7302	9.0086	1.50143	7.65731	0.16112	9.11333	10.8756	2.60812	0.13091	0.1007	ND	100.15	67.9609			185	136		65	65			9	121	354				74			29	5
Basalt of Dry Lake
B15DD030**	This study	41.3378	121.716	48.9387	0.877062	18.5203	9.04304	1.50717	7.68658	0.16086	8.90284	10.4583	2.67382	0.191902	0.0824671	ND	98.7337	67.3662		34.5735	199.955	137.309	199.955	70.132	65.601	15.957		3.2505	95.6435	360.116	1.2805	1.97	ND	59.9			20.685	0.788	4.2355	8.1755	8.274
LM16-4982**	This study	41.3437	121.692	49.221	0.886046	18.2714	9.00379	1.50063	7.65322	0.160087	8.71888	10.5795	2.71848	0.214532	0.0762401	ND	99.2881	67.0017		35.442	206.514	132.759	207.603	63.36	65.34	16.236		4.559	97.119	367.389	2.871	0.792	2.574	60.702			21.681	1.584	2.376	10.098	7.92
LM18-5116*	This study	41.3508	121.688	48.7034	0.890244	18.6051	9.05419	1.50903	7.69606	0.160044	8.81242	10.7329	2.65073	0.150041	0.0900247	-0.082352	99.8349	67.1142		34.7	195.5	132.7	196.6	72.1	66	16.3	ND	0.8	97.4	358.4	1.3	ND	ND	56.9	0.8	ND	20.9	1.7	2.8	11.1	8.2
LM18-5120*	This study	41.3332	121.687	48.8724	0.924036	18.8463	9.27965	1.54661	7.8877	0.162468	8.69203	10.205	2.58933	0.182776	0.0913882	1.08326	98.3559	66.2622		34.8	200.9	127.3	202.8	66.5	65.7	16.3	ND	1.8	95.1	338.5	ND	0.6	2.6	58.1	1	ND	21.4	1.7	4	7.9	8.6
LM18-5121*	This study	41.3365	121.696	48.9595	0.893642	18.5757	9.08866	1.51478	7.72537	0.160655	8.70548	10.5229	2.64076	0.210859	0.0903683	-0.0345614	99.4542	66.7599		35.7	196.5	132.9	196.6	74.4	63.9	16.5	1.1	3.5	100	354.3	1.8	ND	1	57.9	ND	ND	22.2	1.4	2.3	16.3	9.6
92SH-614†	This study	41.4384	121.821	49.0546	0.915957	18.3191	8.96722	1.49454	7.62214	0.162837	8.78301	10.6862	2.65628	0.183191	0.122128	0.51	99.09	67.2533				114		86	63				101	374				64			17	ND
94SH-780†	This study	41.4075	121.779	48.9116	0.875578	18.4173	8.81314	1.46886	7.49117	0.161026	8.93693	10.7686	2.66699	0.191218	0.110705	ND	100.19	68.013				117		74	62			ND	106	362				60			19
97SH-883†	This study	41.4843	121.827	49.0704	0.886185	18.6119	8.67753	1.44625	7.3759	0.156981	8.68057	10.7082	2.79528	0.148879	0.119508	-0.05	99.547	67.7164				99		69	71				118	377				68				ND
97SH-905†	This study	41.4211	121.755	49.0621	0.893	18.6676	8.87091	1.47848	7.54027	0.158665	8.692	10.5095	2.68409	0.190195	0.124084	0.49	99.144	67.2617				119		93	71				98	366				60
99SH-997†	This study	41.4463	121.846	49.6747	0.94468	18.4119	8.35162	1.39194	7.09888	0.162864	8.70347	10.462	2.80511	0.249405	0.0951515	ND	100.025	68.6043		36.4	196.8	133.9	210.9	73.9	68.2	17.2		5.8	103.8	374.8	2.1	ND	ND	64.2			23.2	2.6	4.2	10.1	8
99SH-1013†	This study	41.4752	121.827	48.8896	0.883832	18.4404	8.95464	1.49244	7.61144	0.159666	8.76707	10.7633	2.74102	0.16397	0.0872251	ND	101.3	67.2442		35	205.3	133.9	208.5	77.4	66.9	17.3		1.4	101.9	374.2	2.1	ND	1	62			22.7	2.5	1.8	11.8	7.7
00SH-1057†	This study	41.3919	121.735	48.8457	0.864204	18.6788	8.71808	1.45301	7.41037	0.157964	8.84695	10.7825	2.71288	0.159384	0.0882324	ND	100.821	68.0287		34.5	193.1	136.868	198.9	64.5	64.4	15.3		2.6	92.4	399.4	1.7	ND	2.1	57.4			20.7	ND	5.8	12.3	10.4
00SH-1058†	This study	41.4386	121.744	48.8362	0.893187	18.483	8.87055	1.47843	7.53997	0.16118	8.89927	10.7505	2.71374	0.1584	0.0861355	ND	100.831	67.7794		36.9	198.5	134.898	207.5	74	64.9	14.6		2	109.5	383.7	ND		1.1	59.2			20.8	ND	3.2	4.9	7.5
1280M†	Donnelly-Nolan, 2008	41.4367	121.778	49.0298	0.897871	18.361	9.04327	1.50721	7.68678	0.161415	8.84756	10.6937	2.57255	0.151327	0.0907959	0.35	99.97	67.2285		36	210	110		80	79		ND	3	97	381		ND	ND	74	1.6	ND	23	1	4	9.2	8.7
1849M†	Donnelly-Nolan, 2008	41.4425	121.811	49.1041	0.913092	18.7691	8.95744	1.49291	7.61382	0.162328	8.68452	10.3484	2.62768	0.162328	0.121746	0.68	99.4	67.0286			188	124		77	68				110	375				72			23
2083M†	Donnelly-Nolan, 2008	41.4173	121.718	49.1634	0.875785	18.4114	8.73297	1.4555	7.42303	0.159234	8.84742	10.6488	2.64726	0.208994	0.159234	ND	101.31	67.9928			166	116		73	64			3	93	385				64			20	3
2084M†	Donnelly-Nolan, 2008	41.4145	121.719	49.3388	0.911805	18.844	8.95393	1.49232	7.61084	0.162099	8.52031	10.1312	2.62397	0.212755	0.151968	1.18	99.54	66.614			175	126		74	65			2	100	372				64			21	3
2085M†	Donnelly-Nolan, 2008	41.4038	121.719	49.1115	0.908363	18.3669	8.87601	1.47933	7.5446	0.159712	8.67437	10.6808	2.73507	0.189658	0.14973	ND	101.02	67.2043			162	117		77	63			3	99	391				68			23	3
2086M†	Donnelly-Nolan, 2008	41.3888	121.721	49.1768	0.883176	18.6671	8.8157	1.46928	7.49335	0.160577	8.75147	10.4375	2.63949	0.170614	0.150541	0.3	100.47	67.5487			175	132		76	70			3	101	400				65			21	3
2087M†	Donnelly-Nolan, 2008	41.3803	121.74	48.5358	0.902525	18.8527	8.91695	1.48616	7.57941	0.160449	8.98514	10.6297	2.59727	0.120337	0.150421	0.41	100.56	67.8751			158	126		80	61			2	98	391				63			20	2
2088M†	Donnelly-Nolan, 2008	41.3895	121.736	49.066	0.894851	18.6008	8.85903	1.4765	7.53017	0.160872	8.6871	10.5572	2.70466	0.160872	0.160872	0.14	100.29	67.2788			192	133		76	63			3	130	396				66			23	2
2089M†	Donnelly-Nolan, 2008	41.4002	121.74	48.6806	0.871443	18.8312	8.86167	1.47695	7.53242	0.160265	8.92477	10.6176	2.58428	0.160265	0.160265	0.1	100.67	67.8637			165	126		76	63			2	98	380				64			21	2
2090M†	Donnelly-Nolan, 2008	41.3967	121.71	48.9339	0.889708	18.8052	8.78991	1.46498	7.47142	0.161765	8.93752	10.7169	2.32537	0.141544	0.151655	0.09	99.73	68.0718			205	134		81	66			ND	105	396				66			22	2
2091M†	Donnelly-Nolan, 2008	41.3792	121.732	48.4486	0.900193	18.813	9.02115	1.50353	7.66798	0.161833	8.96148	10.6203	2.68035	0.121374	0.121374	0.4	99.71	67.5635			232	140		78	68			ND	90	390				60			22	ND
2092M†	Donnelly-Nolan, 2008	41.417	121.736	48.9184	0.92165	18.7368	9.05141	1.50857	7.6937	0.162048	8.7101	10.4319	2.65354	0.15192	0.111408	0.51	99.58	66.8627			206	135		87	69			2	121	386				64			22	2
2093M†	Donnelly-Nolan, 2008	41.4167	121.72	48.9247	0.907881	18.7629	8.95171	1.49195	7.60895	0.161401	8.82662	10.6928	2.34032	0.131138	0.151314	0.02	99.97	67.4003			209	130		72	67			2	110	393				67			24	3
Basalt of Hammond Crossing
B15DD005A**	This study	41.2054	121.632	49.208	0.888395	18.3728	9.04073	1.50679	7.68462	0.160279	8.72727	10.4713	2.69567	0.198838	0.0861132	ND	99.6133	66.9325		35.9525	207.441	133.073	205.471	71.4125	66.192	15.76		3.8415	105.001	362.874	1.379	1.2805	0.985	61.3			21.079	1.576	2.364	17.2375	8.7665
LM15-4944**	This study	41.184	121.59	48.9568	0.922022	18.3952	9.29253	1.54876	7.89865	0.163429	8.69415	10.5524	2.62501	0.155987	0.087563	ND	99.1392	66.2367		36.75	210.798	126.714	213.64	70.462	66.64	16.268		2.744	98	357.896	0.784	0.98	0.784	62.8			22.638	0.98	2.45	10.29	6.664
LM16-5020**	This study	41.186	121.614	49.29	0.89	18.67	8.94	1.49	7.6	0.16	8.65	10.44	2.55	0.18	0.08	ND		67		35	206	132	203	52	63	17		4	95	360	2	1	2	61			22	1	3	12	8
LM16-5025**	This study	41.1746	121.572	49.72	0.94	18.05	9.03	1.5	7.67	0.17	8.45	10.47	2.69	0.25	0.08	ND		66.2		37	206	125	216	58	67	16		6	106	358	1	1	ND	65			23	ND	3	12	8
LM16-5026**	This study	41.1746	121.572	49.57	0.88	18.2	8.79	1.47	7.47	0.16	8.59	10.68	2.66	0.23	0.08	ND		67.2		35	203	132	208	68	63	16		4	98	364	2	1	1	61			22	1.1	5	7	6
Note: All major-oxide analyses (as weight %) have been recalculated to 100% anhydrous with Fe2O3 = 0.15 total Fe as Fe2O3. Original loss on ignition (LOI) and original oxide totals are given. All trace-element abundances are given in ppm. The * symbol denotes samples analyzed for major-oxide and trace-element abundances by wavelength-dispersive X-ray fluorescence (WD-XRF) at the Hamilton Analytic…

## Sheet: G48076
Downs, D.T., et al., 2020, Simultaneous Middle Pleistocene eruption of three widespread tholeiitic basalts in northern California (USA): Insights into crustal magma transport in an actively extending back arc: Geology, v. 48, https://doi.org/10.1130/G48076.1
